# Supplementary material for: Gene Content Evolution in Discobid Mitochondria Deduced from the Phylogenetic Position and Complete Mitochondrial Genome of Tsukubamonas globosa
Source: PubMed Central journal article supplement (PMC3942025; doi:10.1093/gbe/evu015), 2014-01-21
Supplement: supp_evu015_FigS1_20130706.pdf [file supp_evu015_FigS1_20130706.pdf]

|                        |                                   |
|------------------------|-----------------------------------|
| <i>Diplnema</i>        | GLPIHPGHGKRYVPTM-VVSTKPVLPFVTA    |
| <i>Euglena</i>         | GLPVHPGHGKRFVPTL-VQSTRPVLTFFVTA   |
| <i>Naegleria</i>       | GKLIYPGHGVRVYVPTNVQSTRPVVTFVSR    |
| <i>Sawyeria</i>        | GVKIYPGHGLSYVPTVSVQATRPVFKFFDQ    |
| <i>Seculomonas</i>     | GIKVYPGHGLRYVPTANMQSTKLVYPPFLSR   |
| <i>Reclinomonas</i>    | GFRIYPGHGIRYVPTCNMQSTKLVYPPFLSR   |
| <i>Andalucia</i>       | GLRIYPGHGIRYVPTVIGFQSTRPVFAFVTS   |
| <i>Tsukubamonas</i>    | GLKVIYPGHGTRVYVPTCVSVQSTRPIFPFLSR |
| <i>Giardia</i>         | GRKILPGYGKRMSR-----HDKVLLIFLNR    |
| <i>Spiroucleus</i>     | GRQILPGYGKRFPAK-----LDKSLVIFLNR   |
| <i>Trichomonas</i>     | GHIIFHAGHGRVHIR-----EDKHLMAFESR   |
| <i>Trimastix</i>       | **RIYPGHGIRFVR-----LDSKALFASG     |
| <i>Tritrichomonas</i>  | GHQINPGHGRVHIR-----EDKHMVFESR     |
| <i>Malawimonas</i>     | GFKIYPGHGRFIR-----GDSKLFQFLNS     |
| <i>Homo</i>            | GKVIYPGHGRRYAR-----TDGKVFQFLNA    |
| <i>Drosophila</i>      | GKVIYPGHGRVTK-----IDGKSFVFLDK     |
| <i>Monosiga</i>        | SYKIHAGHGRRLVR-----VDGKTFYFLGS    |
| <i>Saccharomyces</i>   | GAKIYPGRGTLFVR-----GDSKIFRFQNS    |
| <i>Ustilago</i>        | QRKIYPGKGRVYV-----GDNKVFVSVSS     |
| <i>Thecamonas</i>      | GKVIYPGKGMFIR-----SDARLKFVGSR     |
| <i>Acanthamoeba</i>    | GKVIYPGHGRRYAR-----TDMKTFVFINA    |
| <i>Dictyostelium</i>   | EFKIYPARGMKFVR-----GDSKVFHFINT    |
| <i>Guillardia</i>      | NFRIYPGHGCLYIR-----TDGKSFVFINA    |
| <i>Rhodomonas</i>      | NFRIYPGHGTLFIR-----IDGKAFRFING    |
| <i>Emiliana</i>        | GLRIYPGHGIFVVR-----ADQKSFKFINR    |
| <i>Isochrysis</i>      | GLRIYPGHGIFVVR-----ADQKSFKFLNR    |
| <i>Arabidopsis</i>     | GQKIYPGRGIRFIR-----SDSQVFLFLNS    |
| <i>Oryza</i>           | GQKIYPGRGIRFIR-----ADSQVFLFANS    |
| <i>Ostreococcus</i>    | GLRVYPGHGTRLTK-----IDSTTFLLNG     |
| <i>Chlamydomonas</i>   | GLRIYPGKGMFIR-----TDGQHYMFLNK     |
| <i>Cyanidioschyzon</i> | GFRIYPGHGSTFVR-----SDGKVFVFNAS    |
| <i>Gracilaria</i>      | GFRIYPGHGRYIR-----VDGRQYVFNVA     |
| <i>Cyanophora</i>      | GKVIYPGHGKMFVR-----ADNRSMFVSS     |
| <i>Thalassiosira</i>   | EYRIWPGTGKLFIR-----RDGKPIFLGSS    |
| <i>Blastocystis</i>    | EYKIYPGHGGMVIR-----KDGQPVHFLNH    |
| <i>Cryptosporidium</i> | EYRIYPGRGRFVA-----RDGRVSTFLNQ     |
| <i>Toxoplasma</i>      | EYRIYPGRGRFVA-----KDGKVFHFIHR     |
| <i>Tetrahymena</i>     | EYRIYPGRGRFVA-----KDGKVFHFIHR     |
| <i>Perkinsus</i>       | EYRIYPGRGRFVA-----KDGKVFHFIHR     |
| <i>Bigeloviella</i>    | EYRIYPGRGRFVA-----KDGKVFHFIHR     |

Kamikawa et al. (Fig. S1)
