# Supplementary material for: Gene Content Evolution in Discobid Mitochondria Deduced from the Phylogenetic Position and Complete Mitochondrial Genome of Tsukubamonas globosa
Source: PubMed Central journal article supplement (PMC3942025; doi:10.1093/gbe/evu015), 2014-01-21
Supplement: supp_evu015_FigS3_20130706.pdf [file supp_evu015_FigS3_20130706.pdf]

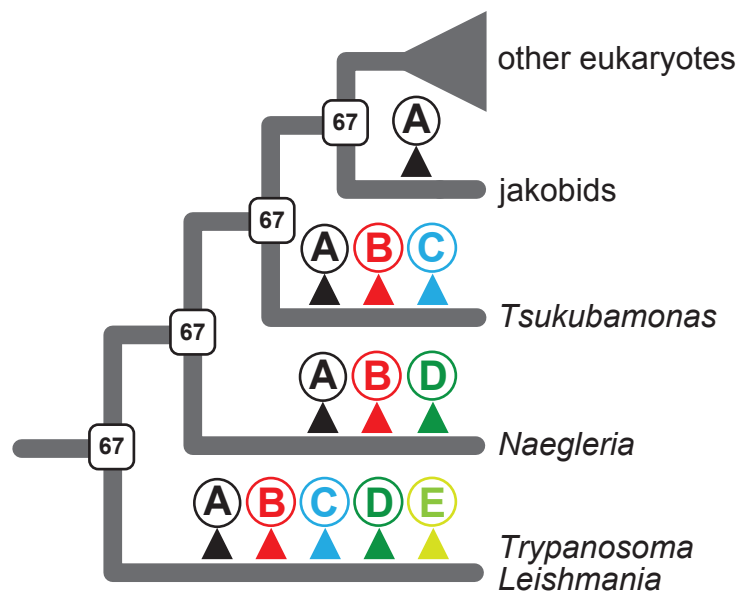

Kamikawa et al. (Fig. S3)
